# Supplementary material
Source: PubMed Central journal article supplement (PMC5825877)

### Supplementary Figure 1: Hyperplasia of the middle ear epithelium after Otitis media.

(A-C) Sections through mouse middle ear at P28 stained for E-Cadherin (brown). (A'-C') Highpower view of ventral epithelium in hypotympanum, as indicated by boxed region in (A). (A, A') WT mouse, (B,B') Tbx1/+ mouse with mild OM. (C, C') Tbx1/+ mouse with severe OM, characterised by infiltrate in the middle ear cavity (\*). The E-Cadherin layer goes from a thin (A') to a thick (C') band with increasing severity of inflammation. (A''-C'') Adjacent slides to above stained for trichrome to highlight the morphology of the tissue. Dotted line in A'-C' indicates boundary between middle ear mucosa and the bony auditory bulla (red in A''-C''), showing dramatic expansion of the mucosa after OM. Scale bar in A'' = 100um. Same scale in A',B',B'', C', C''.

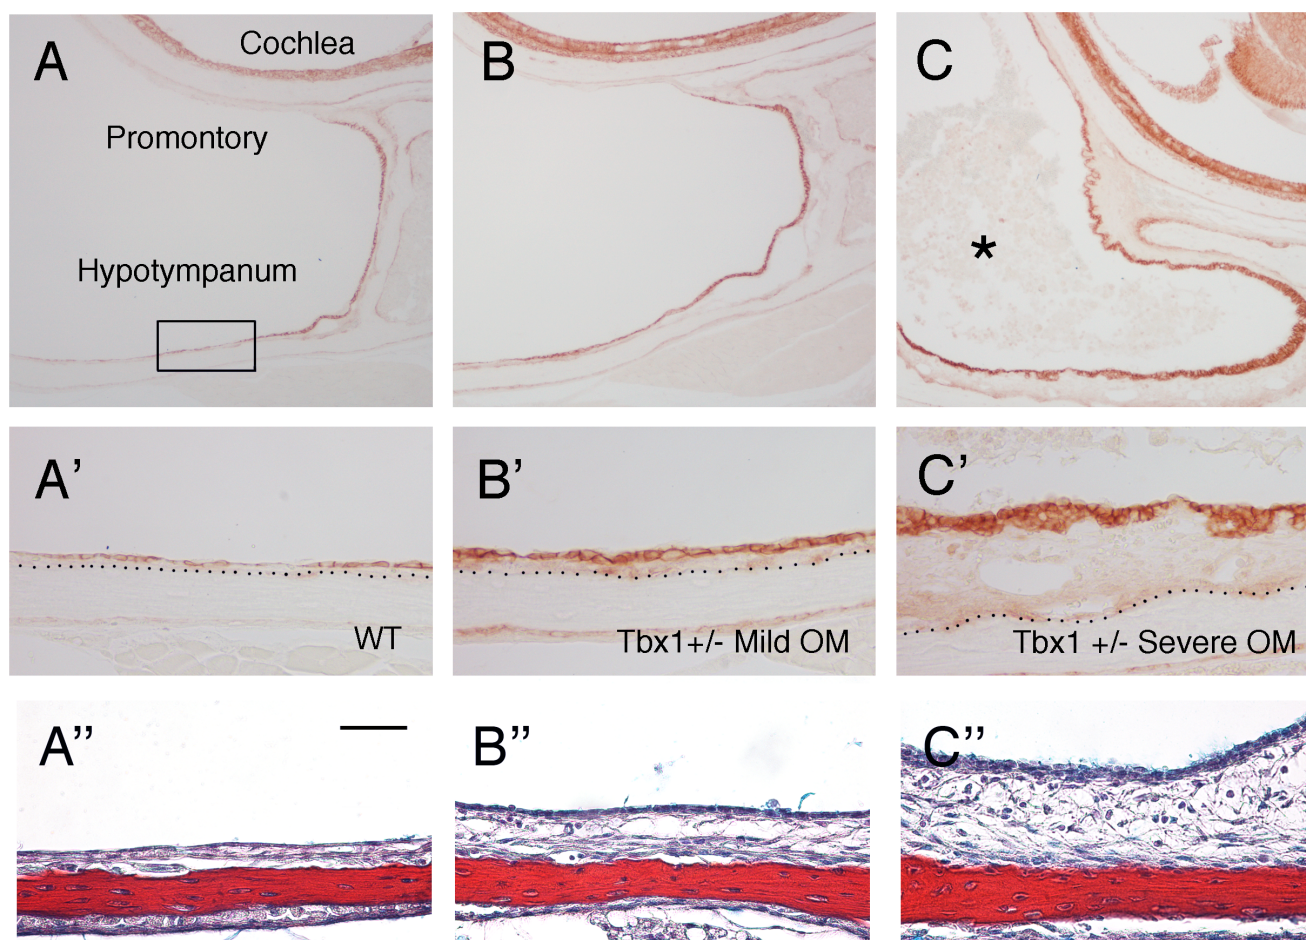

Supplement: develop-145-154393-s1.pdf [file develop-145-154393-s1.pdf]
